# Supplementary material for: Biogenically driven marine organic aerosol production over the West Pacific Ocean
Source: Copernicus journal article supplement (doi:10.5194/bg-23-77-2026), 2026-01-05
Supplement: Supplementary file 1 [file bg-23-77-2026-supplement.pdf]

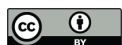

## *Supplement of*

# **Biogenically driven marine organic aerosol production over the West Pacific Ocean**

**Yujue Wang et al.**

*Correspondence to:* Yujue Wang (wangyujue@ouc.edu.cn) and Wei Xu (wxu@iue.ac.cn)

The copyright of individual parts of the supplement might differ from the article licence.

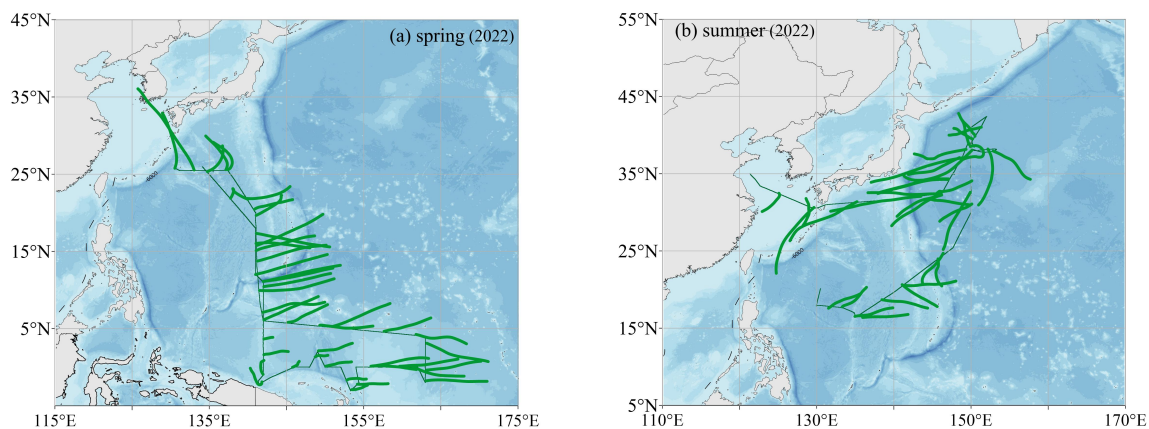

25 **Figure S1** The 24-hr back trajectories of air masses during the cruises in (a) spring and (b) summer.

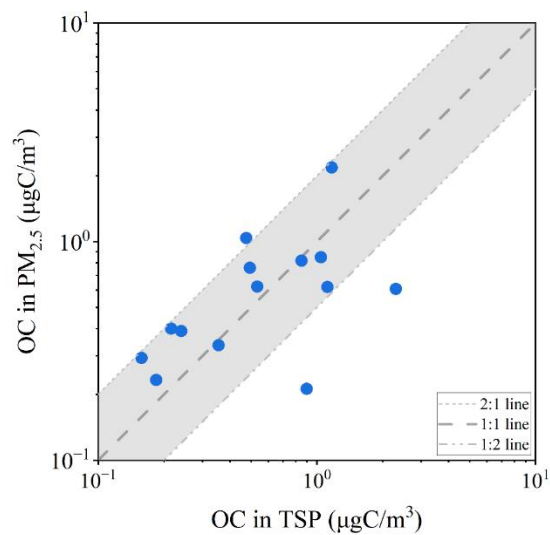

**Figure S2** Comparison of the OC concentrations in the PM<sub>2.5</sub> and the TSP samples during the spring observation (Cruise I)

30

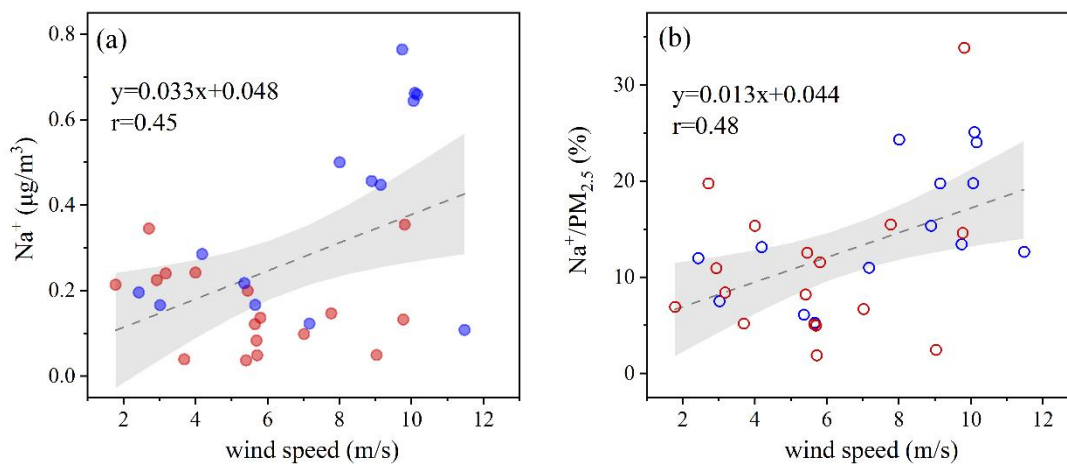

**Figure S3** The variation of Na<sup>+</sup> concentration and Na<sup>+</sup>/PM<sub>2.5</sub> as a function of the wind speed during the cruises. The data obtained during the spring Cruise I is in blue, and the data during the summer Cruise II is in red.

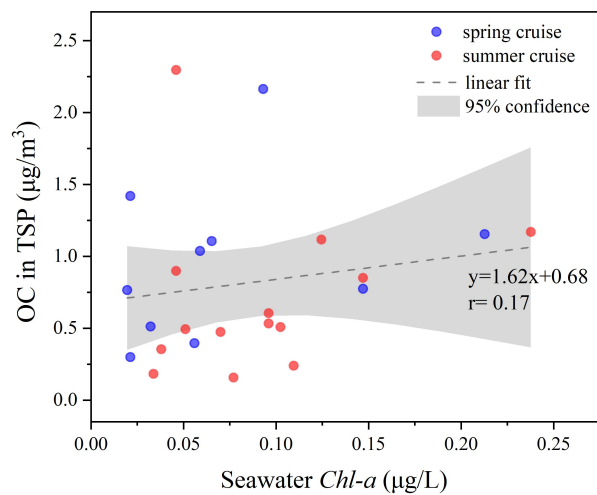

35

**Figure S4** Scatter plot of the OC concentration in the collected TSP samples and seawater *Chl-a* during the cruises.

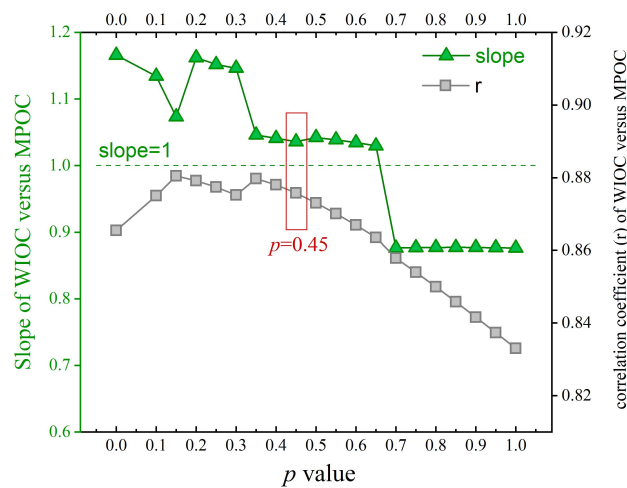

**Figure S5** The variations of the fitting line slopes and correlation coefficients ( $r$ ) of WIOC and estimated MPOC, using Eq. 3 with the  $p$  value changing from 0–1.

40

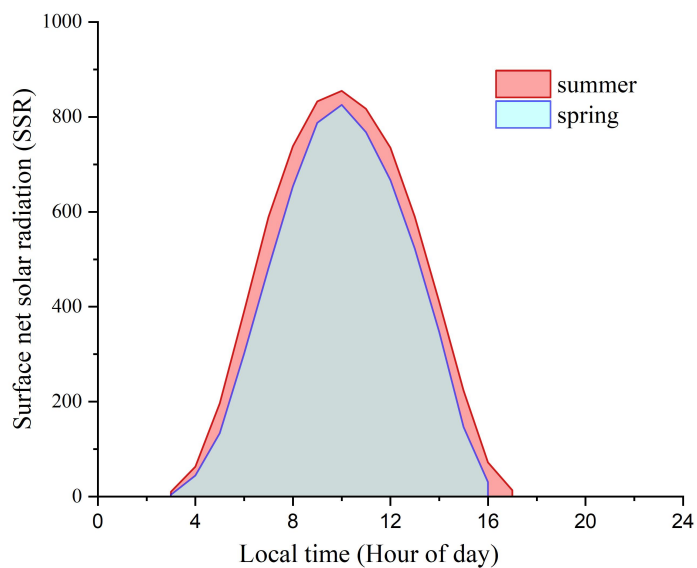

**Figure S6** Diurnal variation of the surface net solar radiation (SSR) within the 15°N–20°N during the spring and the summer cruises.

45

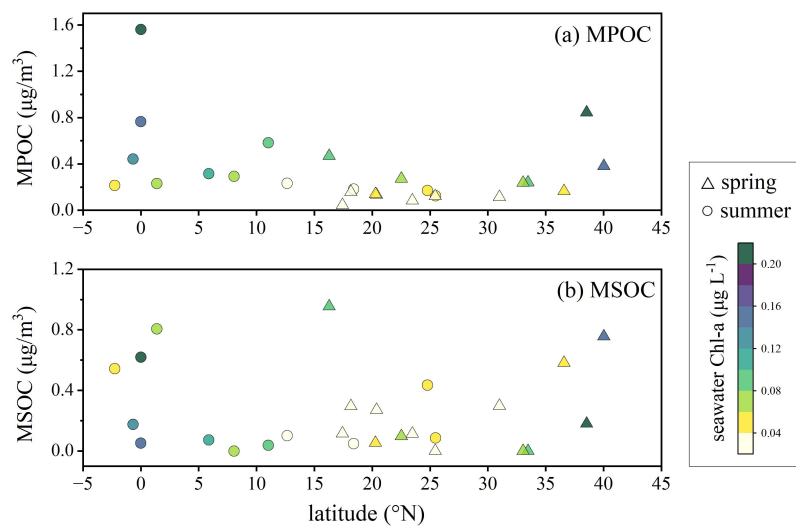

**Figure S7** Spatial distribution of the estimated MPOC and MSOC concentrations. The data is colored by the corresponding seawater *Chl-a* concentrations.

50

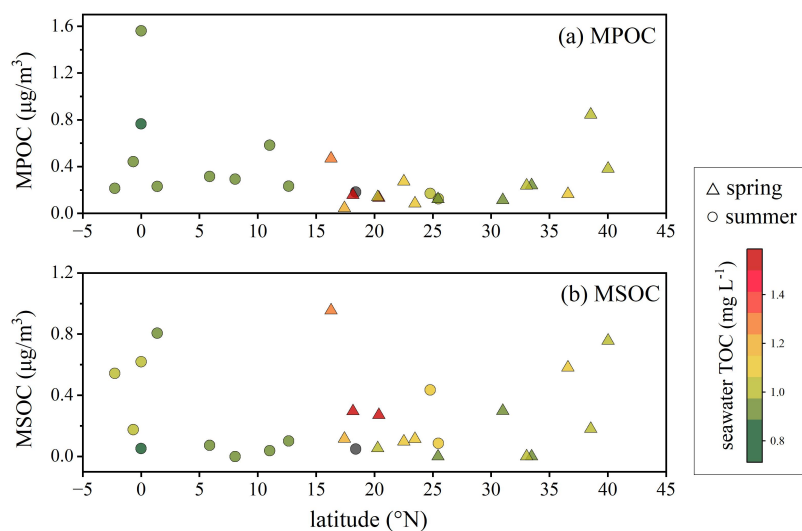

**Figure S8** Spatial distribution of the estimated MPOC and MSOC concentrations. The data is colored by the corresponding seawater TOC concentrations.

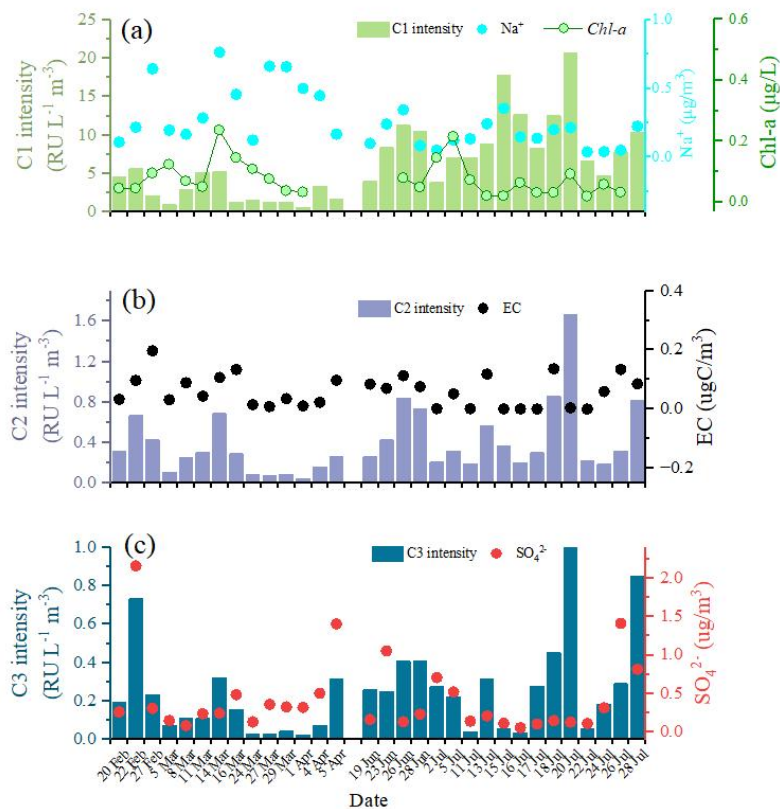

**Figure S9** Variations of fluorescence component intensity identified by three-component solutions based on PARAFAC model analysis and related aerosol components: (a) C1,  $\text{Na}^+$ , and *Chl-a*, (b) C2 and EC, (c) C3 and  $\text{SO}_4^{2-}$ .
